# Supplementary material for: Nafcillin-Loaded Photocrosslinkable Nanocomposite Hydrogels for Biomedical Applications
Source: MDPI journal article supplement (doi:10.3390/pharmaceutics15061588), 2023-05-24
Supplement: s1 [file s1]

# Nafcillin-Loaded Photocrosslinkable Nanocomposite Hydrogels for Biomedical Applications

Gabriela Toader <sup>1,†</sup>, Ionela Alice Podaru <sup>1,2,†</sup>, Edina Rusen <sup>2,\*</sup>, Aurel Diacon <sup>1,2</sup>,  
Raluca Elena Ginghina <sup>3</sup>, Mioara Alexandru <sup>4,\*</sup>, Florina Lucica Zorila <sup>4,5</sup>, Ana Mihaela Gavrila <sup>6</sup>,  
Bogdan Trica <sup>6</sup>, Traian Rotariu <sup>1</sup> and Mariana Ionita <sup>2,7</sup>

<sup>1</sup> Military Technical Academy, “Ferdinand I”, 39-49 G. Cosbuc Blvd., 050141 Bucharest, Romania; nitagabriela.t@gmail.com (G.T.); podaru.alice04@gmail.com (I.A.P.); aurel\_diacon@yahoo.com (A.D.); trotariu@mta.ro (T.R.)

<sup>2</sup> Faculty of Chemical Engineering and Biotechnologies, University Politehnica of Bucharest, 1-7 Gh. Polizu Street, 011061 Bucharest, Romania; mariana.ionita@polimi.it

<sup>3</sup> Research and Innovation Centre for CBRN Defense and Ecology, 225 Șos. Olteniței, 041327 Bucharest, Romania; raluca.ginghina@nbce.ro

<sup>4</sup> Microbiology Laboratory, Horia Hulubei National Institute for R&D in Physics and Nuclear Engineering, 30 Reactorului St., 077125 Magurele, Romania; florina.zorila@nipne.ro

<sup>5</sup> Department of Genetics, Faculty of Biology, University of Bucharest, 91-95 Splaiul Independentei, 050095 Bucharest, Romania

<sup>6</sup> National Institute of Research, Development for Chemistry and Petrochemistry, 202 Splaiul Independentei, 060041 Bucharest, Romania; ana.gavrila@icechim.ro (A.M.G.); bogdan.trica@icechim.ro (B.T.)

<sup>7</sup> eBio-Hub Research Centre, University Politehnica of Bucharest-Campus, Iuliu Maniu 6, 061344 Bucharest, Romania

\* Correspondence: edina.rusen@upb.ro (E.R.); mioara.alexandru@nipne.ro (M.A.)

† These authors contributed equally to this work.

## Contents

|                                                                                                                  |    |
|------------------------------------------------------------------------------------------------------------------|----|
| Figure S1. FT-IR analysis for the synthesized hydrogels, TiO <sub>2</sub> , ZnO and monomers (NVP, TEGDVE) ..... | 2  |
| Figure S2. SEM image and EDX mapping of lyophilized P1 .....                                                     | 3  |
| Figure S3. SEM image and EDX mapping of lyophilized P1-TiO <sub>2</sub> .....                                    | 4  |
| Figure S4. SEM image and EDX mapping of lyophilized P1-ZnO .....                                                 | 5  |
| Figure S5. SEM image and EDX mapping of lyophilized P2 .....                                                     | 6  |
| Figure S6. SEM image and EDX mapping of lyophilized P2-TiO <sub>2</sub> .....                                    | 7  |
| Figure S7. SEM image and EDX mapping of lyophilized P2-ZnO .....                                                 | 8  |
| Figure S8. SEM images of lyophilized samples .....                                                               | 9  |
| Figure S9. Exemplification of equilibrium - swollen nanocomposite hydrogel films .....                           | 9  |
| Figure S10. Nafcillin loading efficiency in the hydrogels .....                                                  | 10 |
| Figure S11. Nafcillin release - data fitting for sample P1 .....                                                 | 10 |
| Figure S12. Nafcillin release - data fitting for sample P2 .....                                                 | 11 |
| Figure S13. Nafcillin release - data fitting for sample P2.1 (P2 – TiO <sub>2</sub> ) .....                      | 12 |
| Figure S14. Nafcillin release - data fitting for sample P2.2 (P2 - ZnO) .....                                    | 13 |

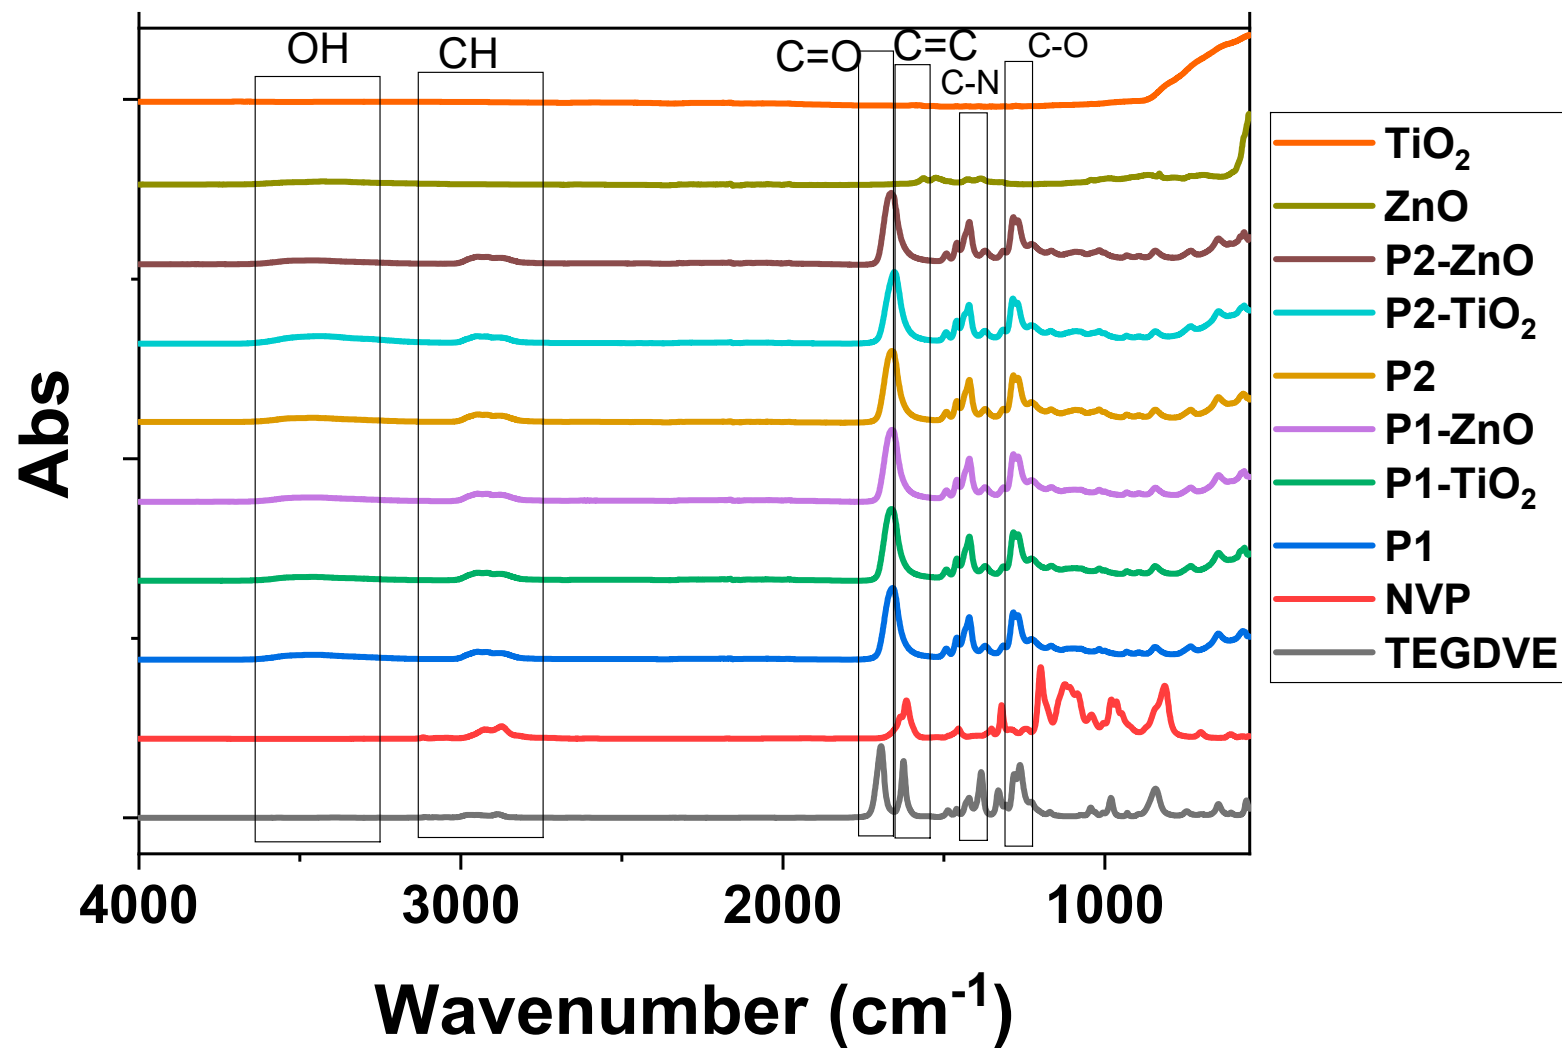

Figure S1. FT-IR analysis for the synthesized hydrogels, TiO<sub>2</sub>, ZnO and monomers (NVP, TEGDVE)

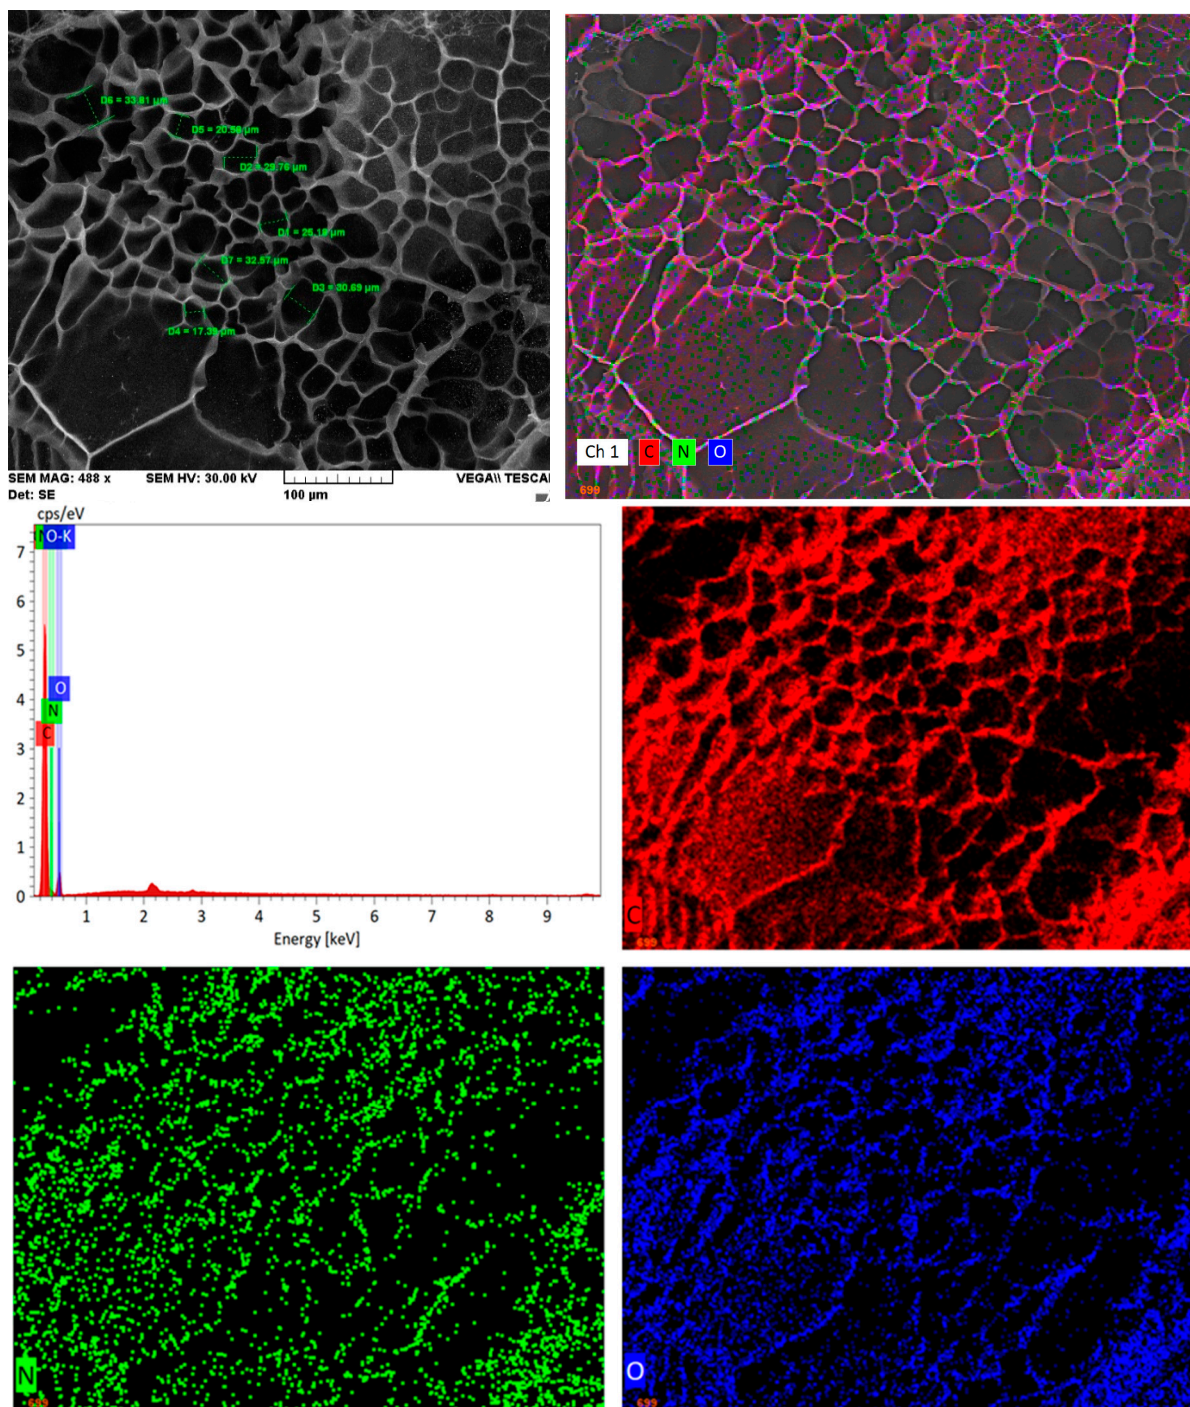

*Figure S2. SEM image and EDX mapping of lyophilized P1*



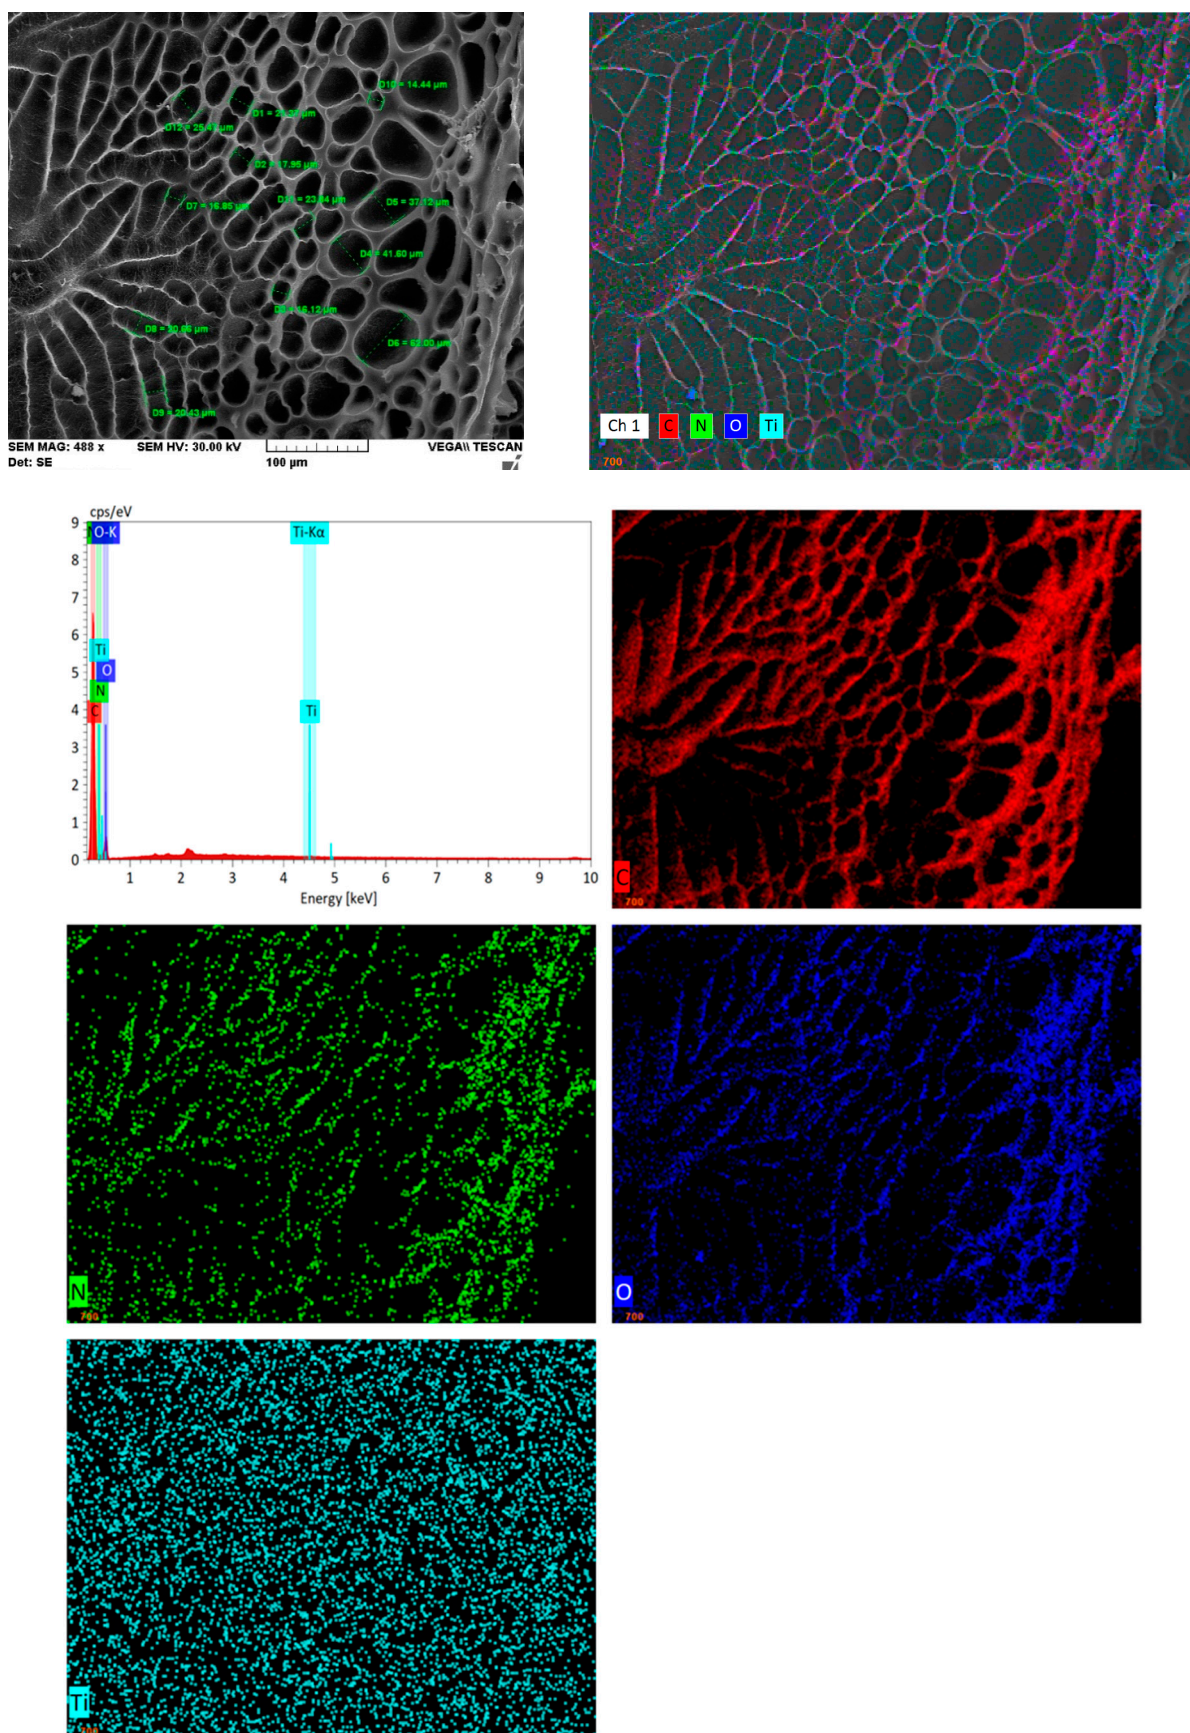

*Figure S3. SEM image and EDX mapping of lyophilized P1-TiO<sub>2</sub>*



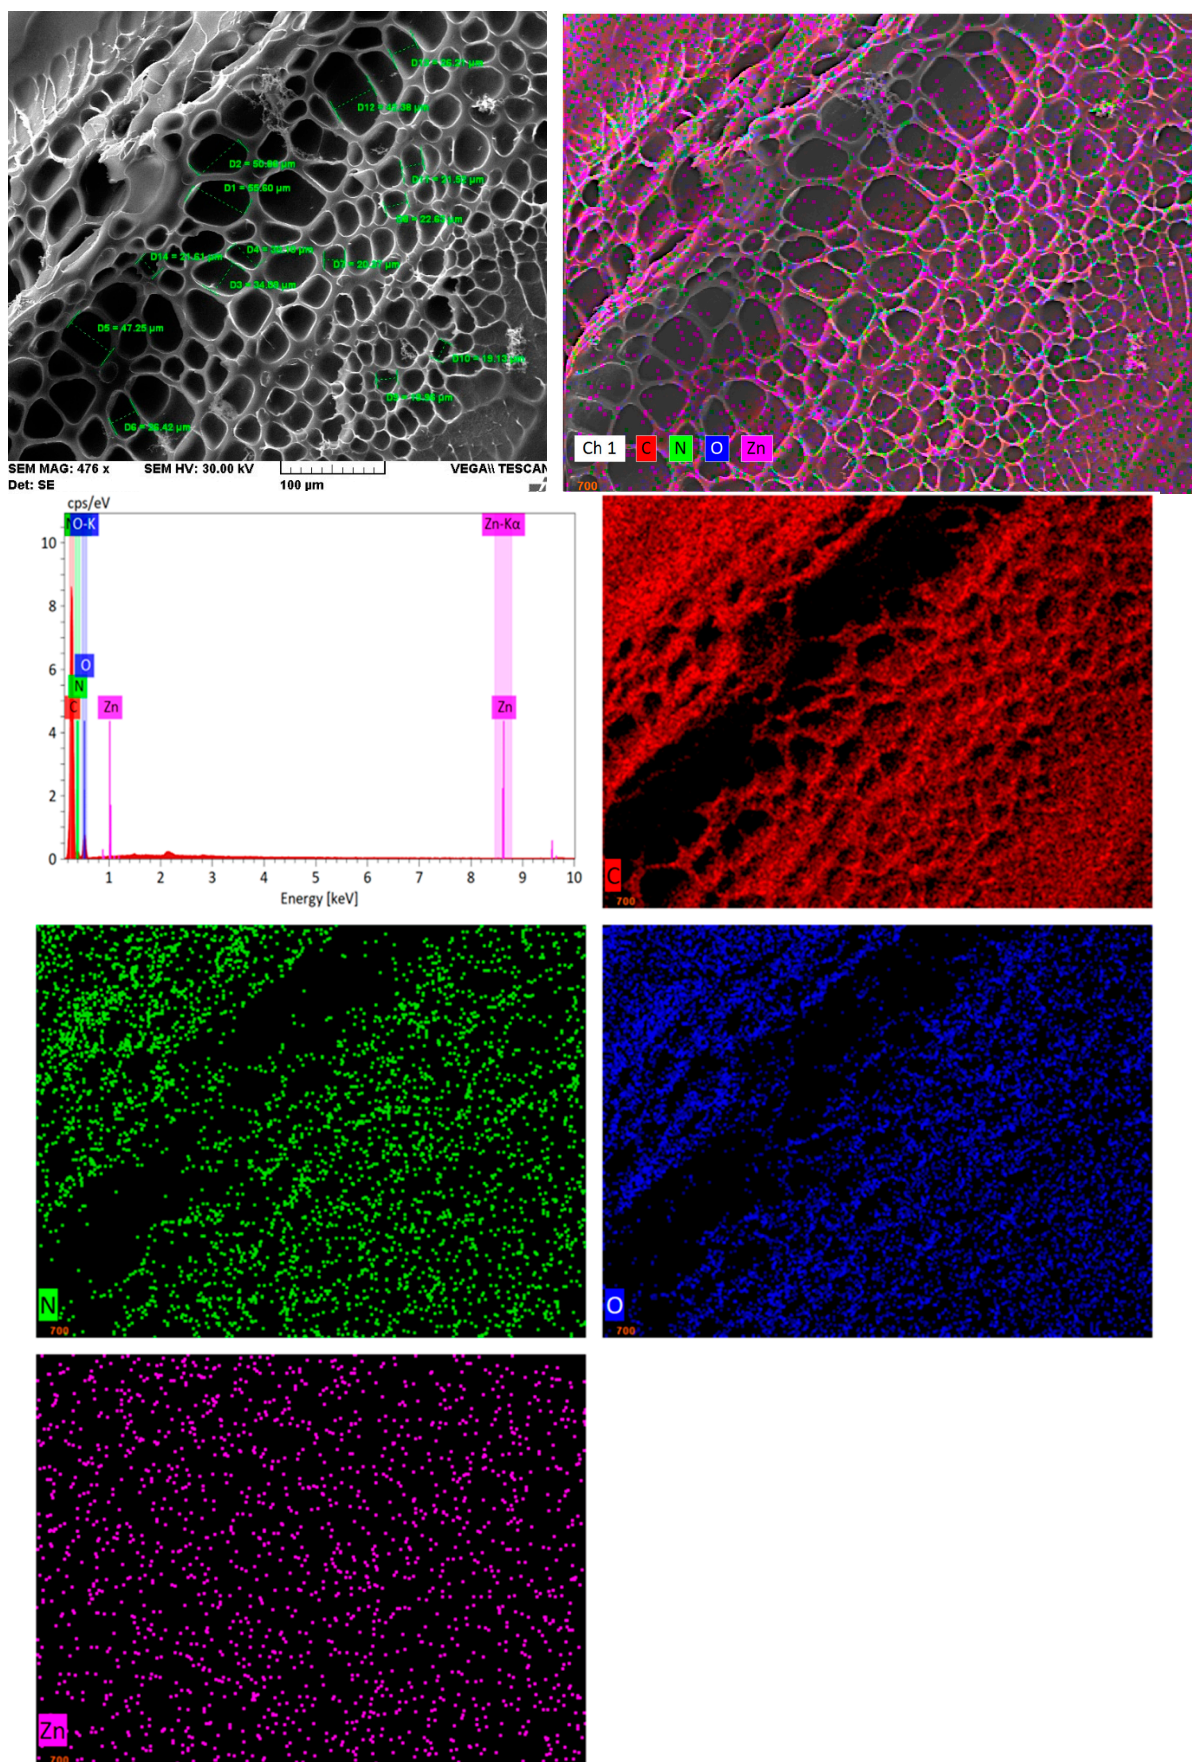

*Figure S4. SEM image and EDX mapping of lyophilized P1-ZnO*

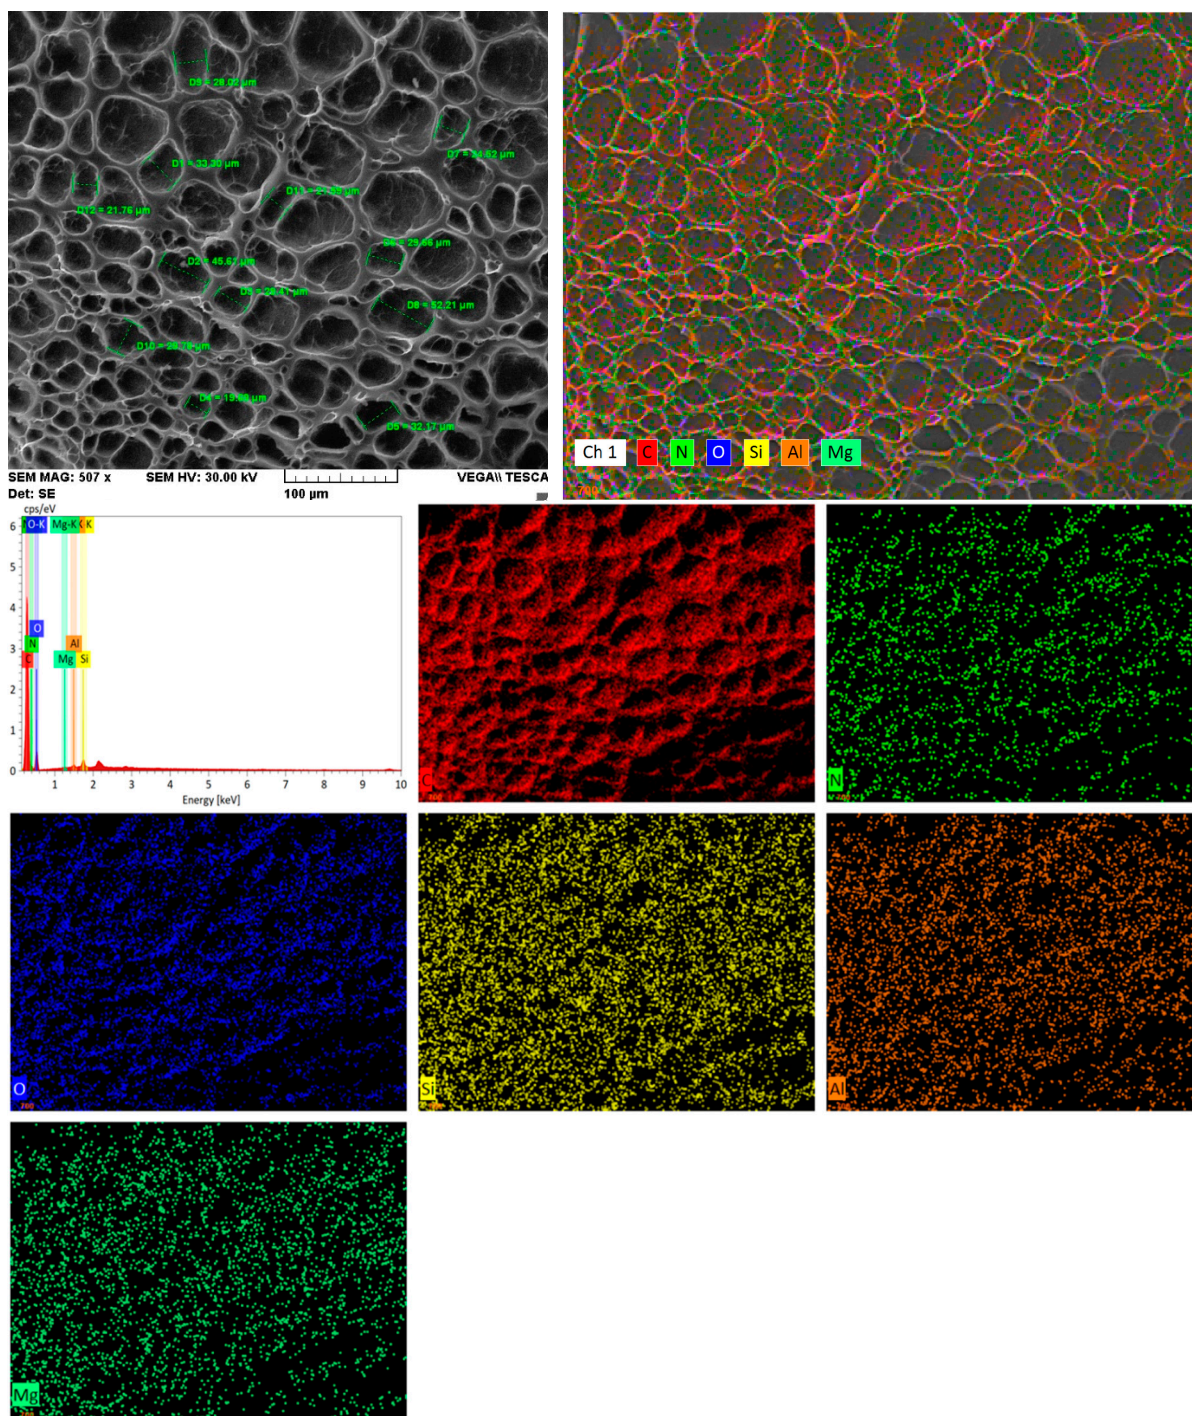

*Figure S5. SEM image and EDX mapping of lyophilized P2*



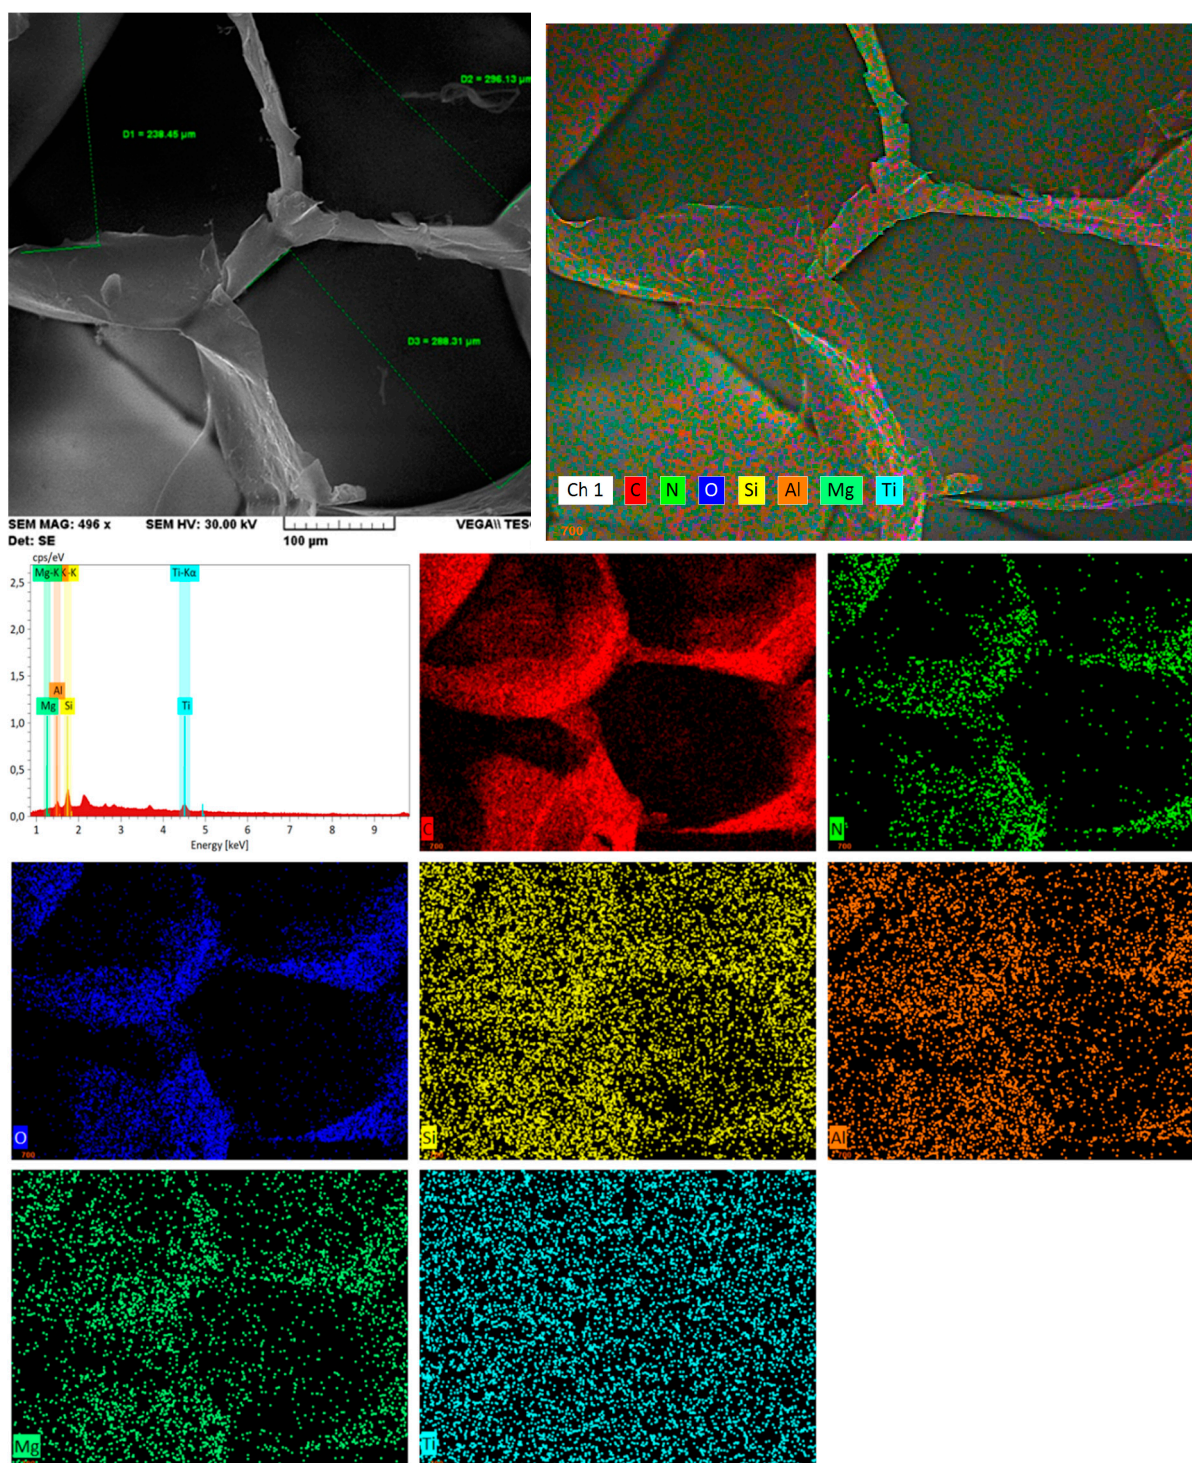

*Figure S6. SEM image and EDX mapping of lyophilized P2-TiO<sub>2</sub>*



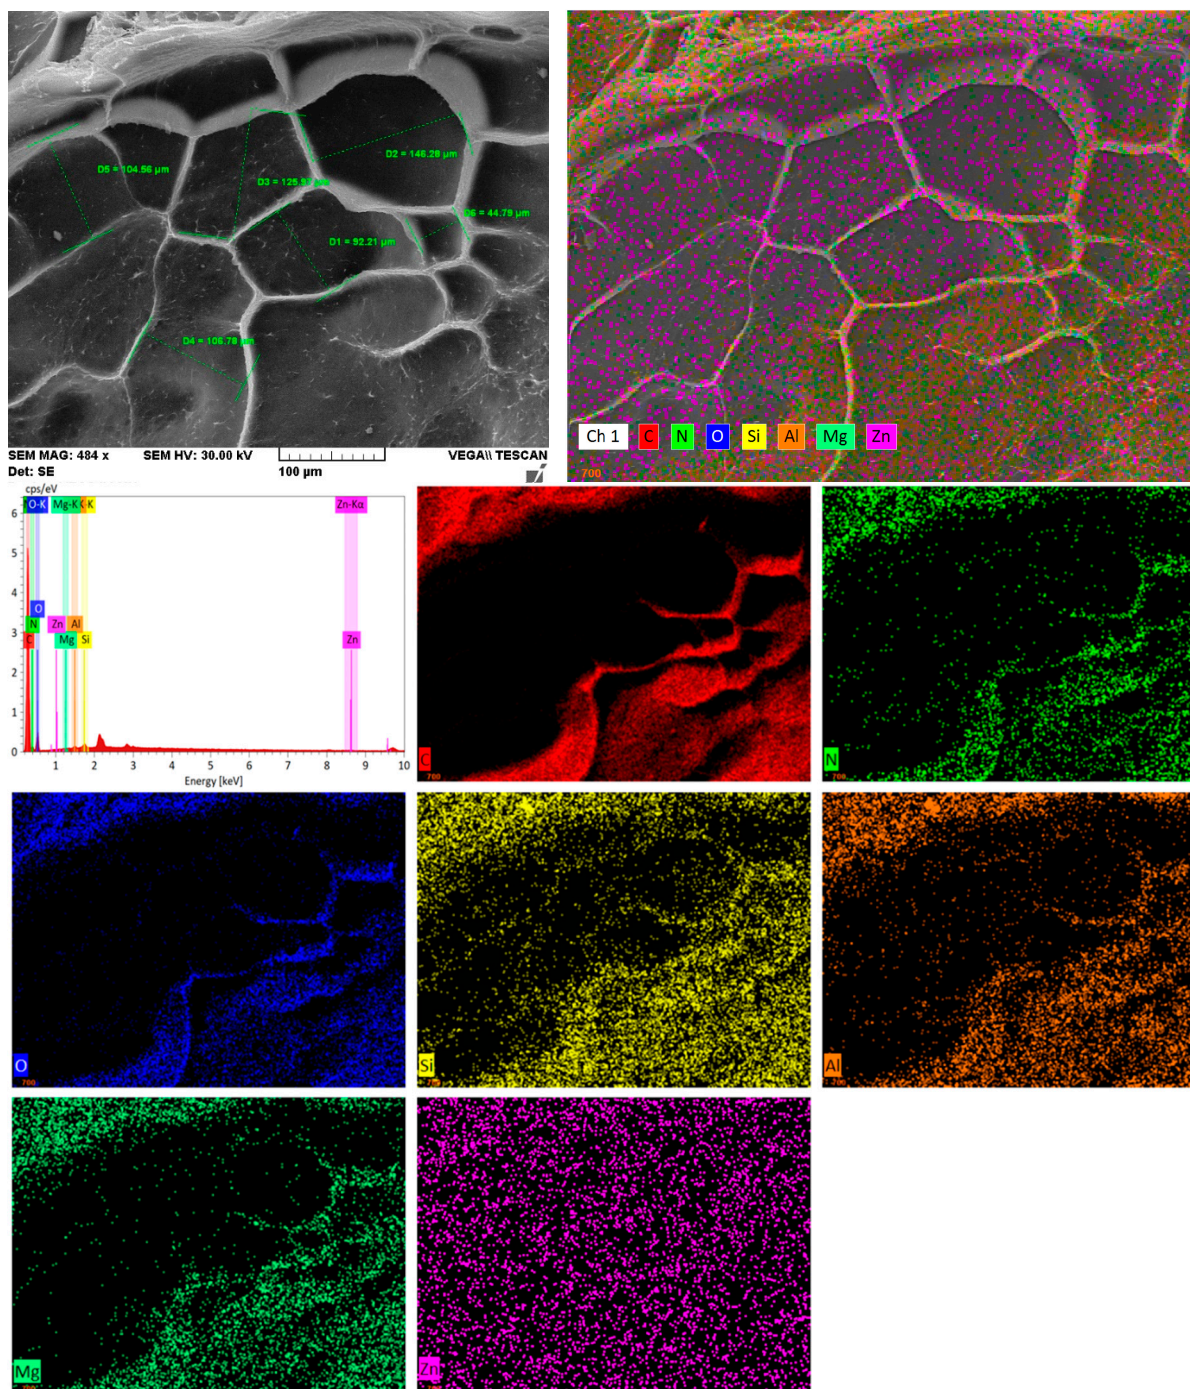

*Figure S7. SEM image and EDX mapping of lyophilized P2-ZnO*



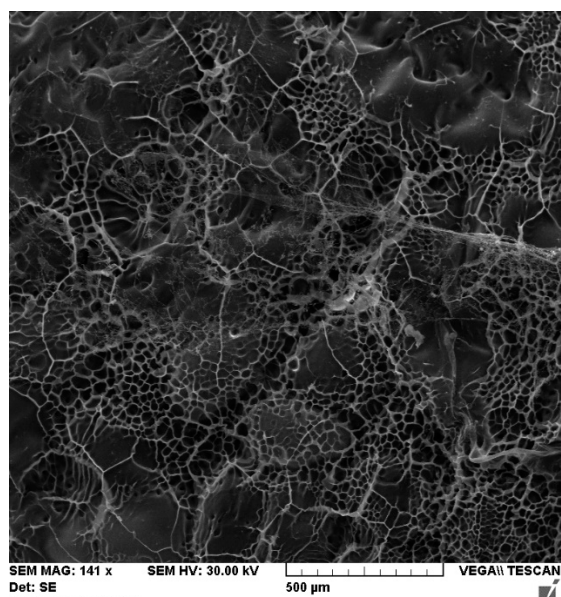

A

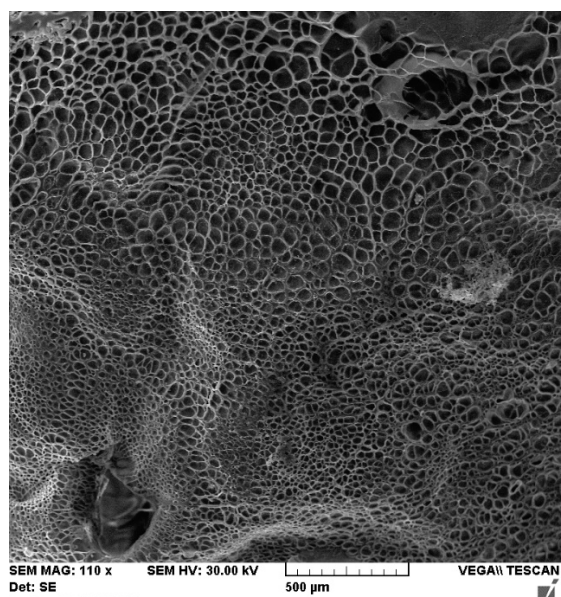

B

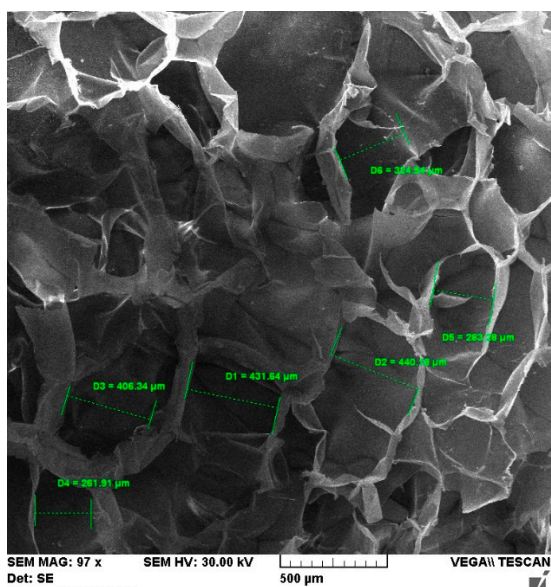

C

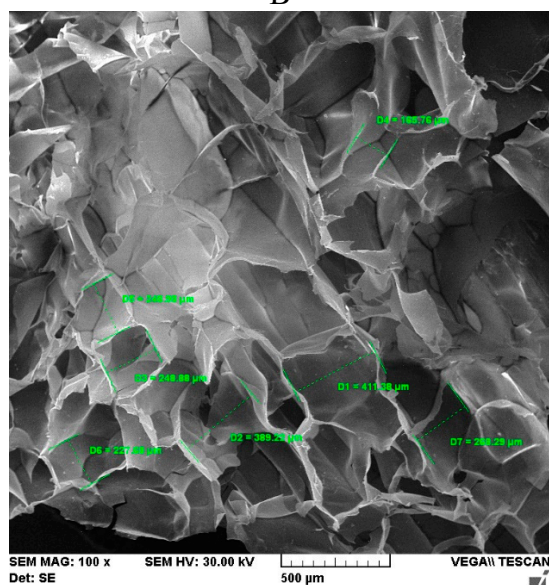

D

**Figure S8. SEM images of lyophilized samples**  
(A) P1, (B) P2, (C) P2-TiO<sub>2</sub>, (D) P2-ZnO

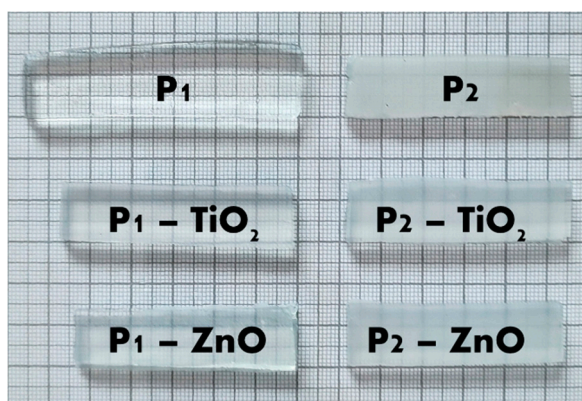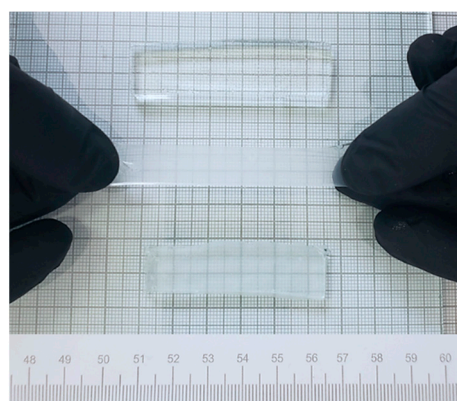

**Figure S9. Exemplification of equilibrium - swollen nanocomposite hydrogel films**

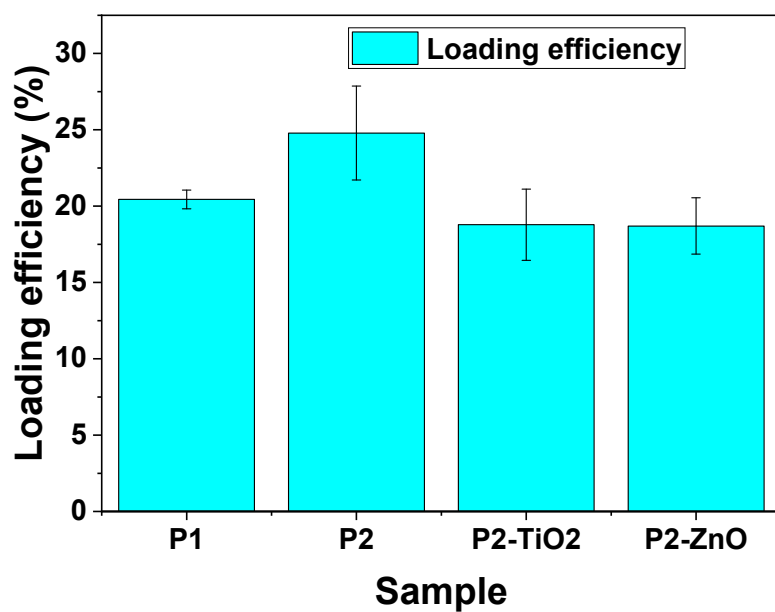

Figure S10. Nafcillin loading efficiency in the hydrogels

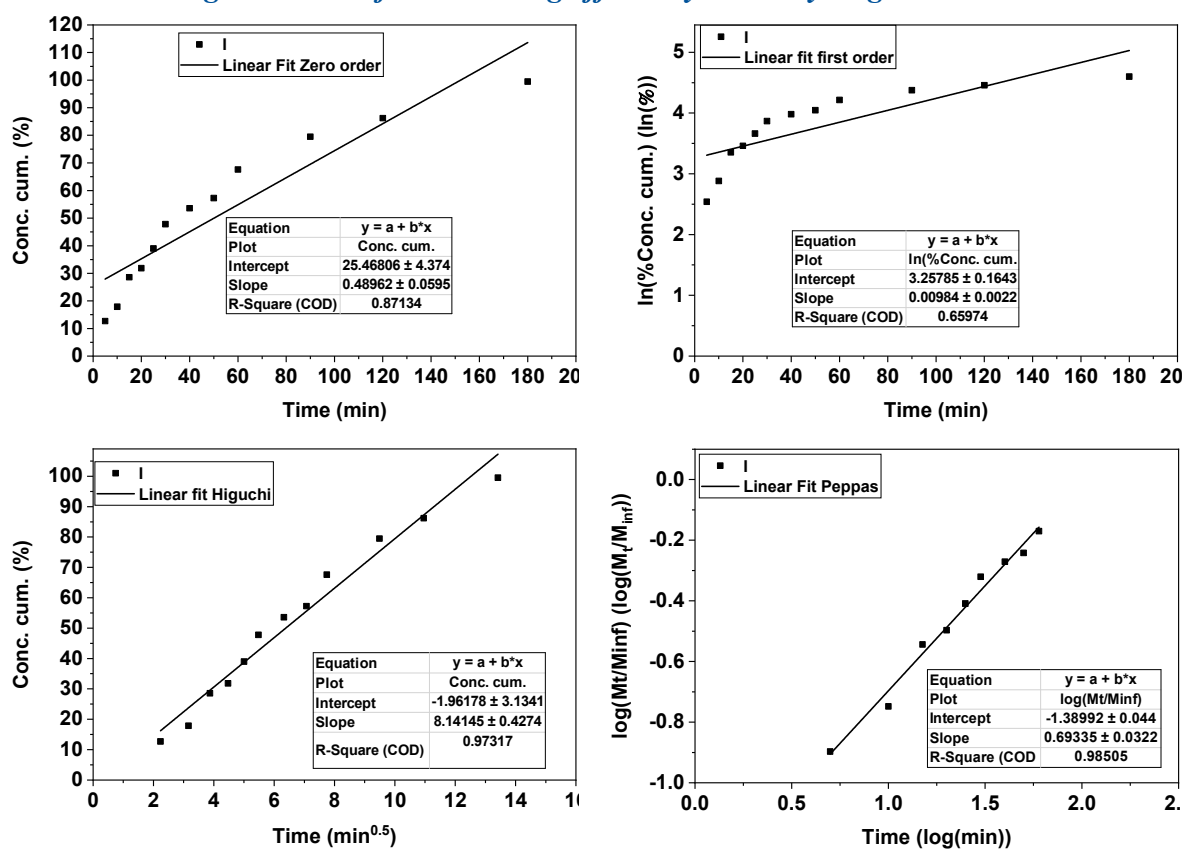

Figure S11. Nafcillin release - data fitting for sample P1



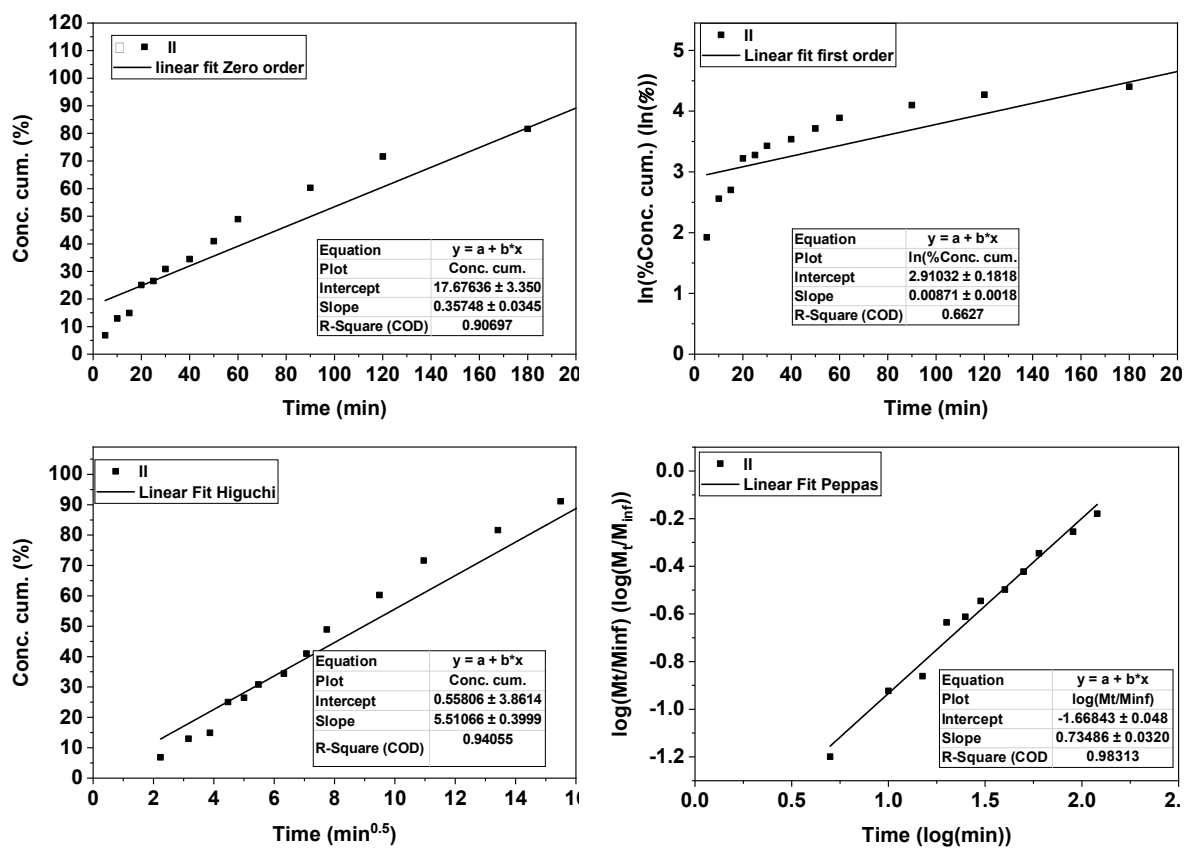

*Figure S12. Nafcillin release - data fitting for sample P2*

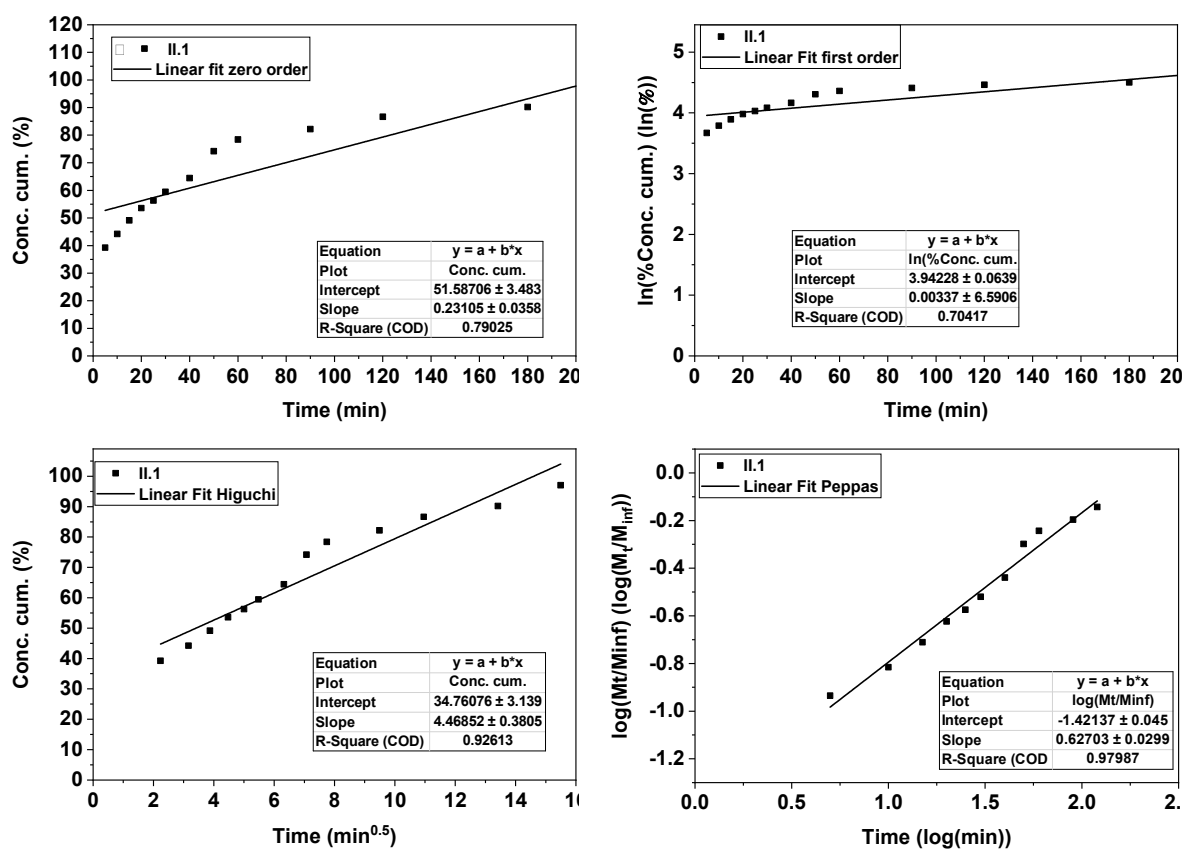

Figure S13. Nafcillin release - data fitting for sample P2.1 (P2 – TiO<sub>2</sub>)

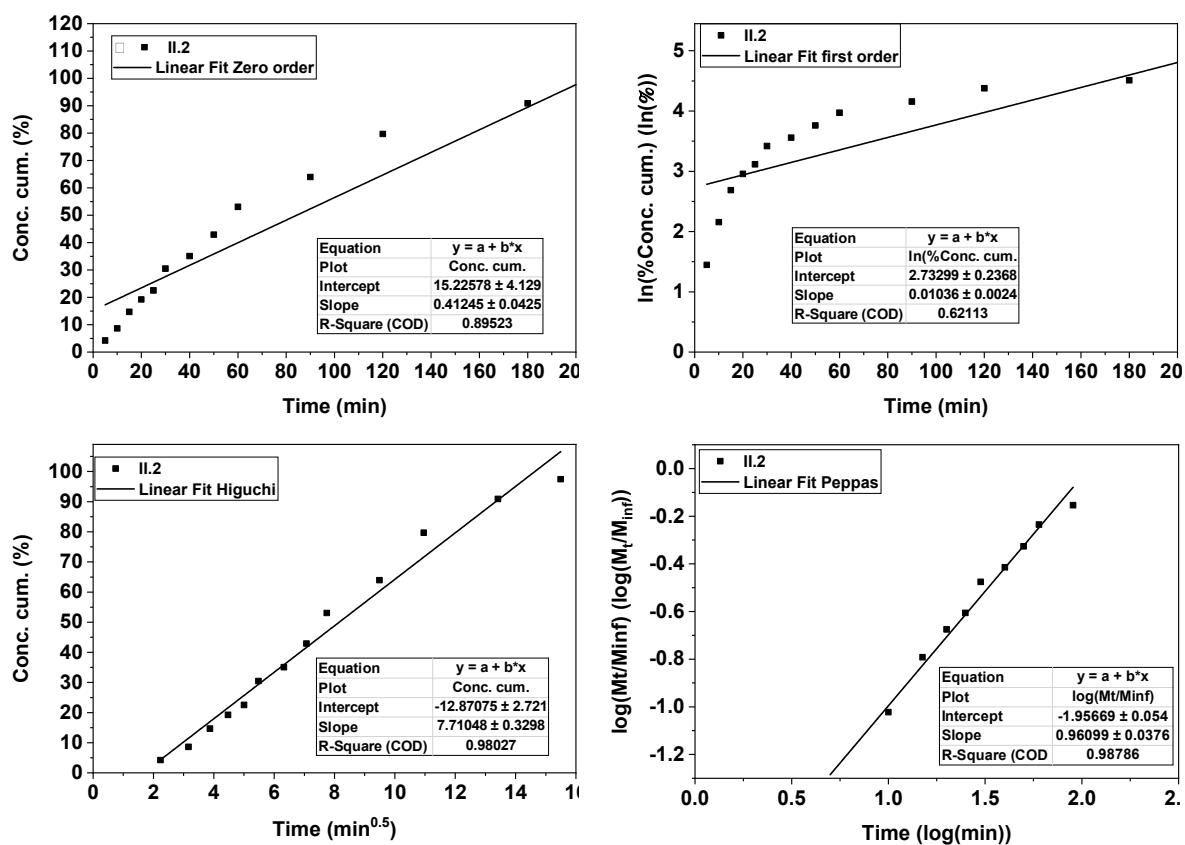

Figure S14 – Nafcillin release - data fitting for sample P2.2 (P2 - ZnO)
